# Supplementary material for: Clinimetric evaluation of methods to measure muscle functioning in patients with non-specific neck pain: a systematic review
Source: Springer Nature journal article supplement (doi:10.1186/1471-2474-9-142), 2008-10-19
Supplement: Additional file 1 [file 1471-2474-9-142-s1.pdf]

Characteristics of studies included in the review

| Test                                   | Author and Purpose               | Patient                                   | Examiner                             | Procedure                                                                                                                                                                                                    | Results                                                                                                                                                                                                                                                                                                                                                                                                                                                                                         |
|----------------------------------------|----------------------------------|-------------------------------------------|--------------------------------------|--------------------------------------------------------------------------------------------------------------------------------------------------------------------------------------------------------------|-------------------------------------------------------------------------------------------------------------------------------------------------------------------------------------------------------------------------------------------------------------------------------------------------------------------------------------------------------------------------------------------------------------------------------------------------------------------------------------------------|
| Muscle endurance of short neck flexors | Blizzard'00 Reliability          | 93 subjects with neck pain and headache   | Physical therapist                   | Patient supine, chin retracted; lift the head 2 cm. Test-retest interval: 1 month; blinded ex-pt: yes                                                                                                        | Grimmer ICC Intra 0.96                                                                                                                                                                                                                                                                                                                                                                                                                                                                          |
| Muscle endurance of short neck flexors | Cleland'06 Reliability Agreement | 22 patients with non-specific neck pain   | Physical therapist                   | Chin tuck neck flexion test; Test-retest interval: immediately after each other; blinded ex-pt: yes                                                                                                          | ICC Inter 0.57 (95% CI 0.14-0.81)<br>SEM 2.3 sec. MDC 6.4 sec. LoA $-1.5 \pm 6.4$                                                                                                                                                                                                                                                                                                                                                                                                               |
| Muscle endurance of short neck flexors | Grimmer'94 Reliability           | 93 healthy subjects                       | ?                                    | Patient supine, chin retracted; lift the head 2 cm; visually confirmed with vertical ruler; test-retest interval: one month; blinded ex-pt: yes                                                              | ICC Intra 0.92 (38 women), 0.93 (55 men) level association R2 0.86 women, R2 0.88 men                                                                                                                                                                                                                                                                                                                                                                                                           |
| Muscle endurance of short neck flexors | Harris'05 Reliability Agreement  | 20 healthy subjects and 20 with neck pain | ?                                    | Supine hook-lying position; test-retest interval: 1 week; blinded ex-pt: no                                                                                                                                  | ICC Intra healthy rater 1 0.82, rater 2 0.91<br>ICC Inter healthy test 1 0.67, test 2 0.78<br>subjects 0.67<br>SEM intra 8.0+11.0 sec inter no neck pain 12.6+15.3sec inter neck pain 11.5 sec                                                                                                                                                                                                                                                                                                  |
| Muscle endurance of short neck flexors | Horneij'02 Reliability Agreement | 22 healthy women                          | Physical therapist                   | Patient supine, hook-lying position, chin retracted; curl up head/neck 10° flexion; 2 measurements with 5-day interval (n = 22); third measurement after 16 days (n = 16); blinded ex-pt: no                 | Intra A1/A2 ICC <sub>2,1</sub> 0.79 (95%CI 0.56-0.91) SEM 15.53 sec, CV 20.1% LOA <sub>ratio</sub> 0.63-1.72<br>Intra A2/A3 ICC <sub>2,1</sub> 0.76 (95%CI 0.45-0.91) SEM 18.61 sec, CV 23.3% LOA <sub>ratio</sub> 0.56-1.77<br>Inter A1-B1 ICC <sub>2,1</sub> 1.0 (95%CI 1.0-1.0)<br>SEM 0.75 sec LOA -1.52-2.70 sec<br>Inter A2/B2 ICC <sub>2,1</sub> 1.0 (95%CI 1.0-1.0)<br>SEM 0.53 sec LOA -1.28-1.73<br>Inter A3/B3 ICC <sub>2,1</sub> 1.0 (95%CI 1.0-1.0)<br>SEM 0.60 sec LOA 1.40-1.99s |
| Muscle endurance of short neck flexors | Kumbhare'05 Reliability Validity | 30 subjects WAD grade II                  | Physical therapist & *Kinesiologist* | Patient supine in hook-lying position, head placed on 9/8 inch particle board, head in neutral position; pull board away; time in sec; test-retest interval: immediately after each other; blinded ex-pt: no | ICC inter 0.96<br>Criterion validity to NDI t=-3.1, p<0.01                                                                                                                                                                                                                                                                                                                                                                                                                                      |
| Muscle endurance                       | Ljungquist '99                   | 24 chronic neck and back pain             | Physical therapist                   | Neck flexors; pt supine; Myrin goniometer fixed on the head; subject lifted head to 10° flexion; time (s)                                                                                                    | Inter LOA -2.43 and 2.33<br>Intra patient 2xSD 13.4 sec (% range 22.3)                                                                                                                                                                                                                                                                                                                                                                                                                          |

|                                        |                                |                                                                                                                      |                    |                                                                                                                                                                                                                                                                                                                             |                                                                                                                                                                                                    |
|----------------------------------------|--------------------------------|----------------------------------------------------------------------------------------------------------------------|--------------------|-----------------------------------------------------------------------------------------------------------------------------------------------------------------------------------------------------------------------------------------------------------------------------------------------------------------------------|----------------------------------------------------------------------------------------------------------------------------------------------------------------------------------------------------|
| of short neck flexors                  | Agreement                      | patients and healthy controls                                                                                        |                    |                                                                                                                                                                                                                                                                                                                             | Intra healthy 14.6 sec (24.3)<br>Inter healthy 19.9 sec (33.2)                                                                                                                                     |
| Muscle endurance of short neck flexors | Olson'06 Reliability Agreement | 27 healthy subjects                                                                                                  | ?                  | Patient supine, in hook-lying position, hand under head; patient lifts head just off the fingers with chin retracted; test-retest interval: 1 or 2 days, blinded ex-pt: no                                                                                                                                                  | ICC intra 0.78&0.85 inter 0.83, 0.85&0.88 (average value) SEM ranged 1.55-3.44 sec<br>Inter-subject variability: average difference between tests: 5.6-7.8 sec SD 6.2-8.4                          |
| Muscle endurance of short neck flexors | Wang'03 reliability            | 32 healthy subject and 30 patients with non-specific neck pain                                                       | Physical therapist | Patient supine, chin retracted; lift the head 2 cm                                                                                                                                                                                                                                                                          | Short neck flexors ICC Intra healthy 0.77, neck pain 0.87                                                                                                                                          |
| Manual muscle test                     | Blizzard'00 Reliability        | 93 subjects with neck pain and headache                                                                              | Physical therapist | Long flexors/extensors, manually tested, as described by Janda; test-retest interval: 1 month; blinded ex-pt: yes                                                                                                                                                                                                           | Grimmer ICC Intra 0.96<br>K Intra Flexors 0.86, extensors 0.78                                                                                                                                     |
| Craniocervical flexion test            | Chiu'05 Reliability            | 10 healthy subjects                                                                                                  | ?                  | Patient supine; inflatable air-filled pressure sensor placed behind the neck, filled to 20 mm Hg; patient slowly performs upper cervical flexion to increase pressure in 5 incremental stages of 2 mm Hg; each stage held for 10 sec; test-retest interval: 1 week; blinded ex-pt: no                                       | K Intra 0.72, agreement 80%                                                                                                                                                                        |
| Craniocervical flexion test            | Hudswell'05 Reliability        | 40 subjects, both patients with neck pain and healthy controls<br>Intra-rater 15 subjects<br>Inter-rater 40 subjects | Osteopaths         | Patient supine; inflatable air-filled pressure sensor placed behind the neck, filled to 20 mm Hg; patient slowly performs upper cervical flexion; activation score pressure achieved and held steady for 10 sec activation score, performance index amount of repetitions; test-retest interval 1 week, blinding ex-pt yes  | ICC Intra Performance index 0.78 (95% CI 0.47-0.92), activation score 0.78 (95% CI 0.47-0.92)<br>ICC Inter Performance index ICC 0.54 (95% CI 0.36-0.70), activation score 0.57 (95% CI 0.37-0.72) |
| Craniocervical flexion test            | Jull'00 Reliability            | 12 healthy subjects, 12 WAD > 3months symptoms                                                                       | ?                  | Patient supine; inflatable air-filled pressure sensor placed behind the neck, filled to 20 mm Hg; patient slowly performs upper cervical flexion to increase pressure in 5 incremental stages of 2 mm Hg; test-retest interval: ?; blinded ex-pt: no                                                                        | ICC Intra 0.65 (22 mm Hg)- 0.89 (28 mm Hg)                                                                                                                                                         |
| Craniocervical flexion test            | Jull'99 Reliability            | 50 healthy subjects                                                                                                  | ?                  | Patient supine; inflatable air-filled pressure sensor placed behind the neck, filled to 20 mm Hg; patient slowly performs upper cervical flexion; activation score pressure achieved and held steady for 10 sec activation score, performance index amount of repetitions; test-retest interval: 1 week; blinded ex-pt: yes | ICC Intra ICC 0.81 activation score, 0.93 performance index                                                                                                                                        |

|                            |                                        |                                                                         |                                                                         |                                                                                                                                                                                                                                                                                                                                                                                          |                                                                                                                                                                                                                                                                                                                                                                                                                                                                 |
|----------------------------|----------------------------------------|-------------------------------------------------------------------------|-------------------------------------------------------------------------|------------------------------------------------------------------------------------------------------------------------------------------------------------------------------------------------------------------------------------------------------------------------------------------------------------------------------------------------------------------------------------------|-----------------------------------------------------------------------------------------------------------------------------------------------------------------------------------------------------------------------------------------------------------------------------------------------------------------------------------------------------------------------------------------------------------------------------------------------------------------|
| Dynamometer                | Agre '87<br>Reliability                | 8 healthy subjects                                                      | 2 faculty<br>physiatrists, 1<br>senior resident in<br>physical medicine | Patient supine; neck flexion tested; break testing 3 or 4 MVC<br>4 sec; 1 min rest; test-retest interval: ?; blinded ex-pt: no                                                                                                                                                                                                                                                           | Pearson R Intra 0.63 0.88 0.98 Inter mean<br>0.88 range (0.70-0.99)                                                                                                                                                                                                                                                                                                                                                                                             |
| Dynamometer                | Philips '00<br>Reliability             | 18 healthy<br>subjects                                                  | 1 female<br>examiner                                                    | Penny and Giles hand-held myometer; patient supine; break<br>testing; neck flexion head raised 30°; chin in Myometer at<br>centre of forehead; test-retest interval: 2 weeks; blinded ex-<br>pt: no                                                                                                                                                                                      | ICC Intra 0.965 (95%CI 0.897-0.978)                                                                                                                                                                                                                                                                                                                                                                                                                             |
| Dynamometer                | Silverman'99<br>Reliability            | 30 healthy<br>subjects, 30 with<br>chronic<br>mechanical neck<br>pain   | ?                                                                       | Microfet dynamometer, sagittally; patient supine, chin<br>retracted, neck flexed, dynamometer at forehead, head<br>rotated; patient supine, head rotated left and right; pain free<br>range and chin tuck; dynamometer above ear; test-retest<br>interval: ?; blinded ex-pt: no                                                                                                          | ICC healthy Isometric testing intra 0.78-<br>0.89 inter 0.81-0.87<br>Break testing intra 0.74-0.89 inter 0.77-<br>0.90<br>Wilcoxon significant difference break test<br>neck pain compared healthy controls                                                                                                                                                                                                                                                     |
| Functional<br>lifting test | Horneij'02<br>Reliability<br>Agreement | 22 healthy women                                                        | Physical therapist                                                      | Cervical PILE test; lift test, lift weights in plastic box from<br>waist (0.76 m) to shoulder 1.37 m); initial 3.6 kg for women<br>and 5.9 kg for men; 4 times, then weight increased by 2.25<br>kg for women and 4.5 kg for men; two measurements with<br>5-day interval (n = 22); third measurement after 16 days (n =<br>16); blinding ex-pt: no                                      | Intra A1/A2 ICC <sub>2,1</sub> 0.88 (BI 0.70-0.96)<br>SEM 8.28s CV 7.8% LOA <sub>ratio</sub> 0.77-1.16<br>Intra A2/A3 ICC <sub>2,1</sub> 0.96 (BI 0.89-0.99)<br>SEM 6.10s CV 5.3% LOA <sub>ratio</sub> 0.88-1.15<br>Inter A1/B1 ICC <sub>2,1</sub> 1.0 (BI 0.99-1.0) SEM<br>1.19s LOA -3.76-3.0s<br>Inter A2/B2 ICC <sub>2,1</sub> 1.0 (BI 1.0-1.0)<br>SEM 1.16s LOA -3.23-3.33s<br>Inter A3/B3 ICC <sub>2,1</sub> 1.0 (BI 1.0-1.0) SEM<br>0.77s LOA -1.80-2.55 |
| Functional<br>lifting test | Ljungquist<br>'99<br>Agreement         | 24 chronic neck<br>and back pain<br>patients and<br>healthy controls    | Physical therapist                                                      | Cervical PILE test; lift test, lift weights in plastic box from<br>waist (0.76m) to shoulder 1.37m); initial 3.6 kg for women<br>and 5.9 kg for men; 4 times, then weight increased by 2.25<br>kg for women and 4.5 kg for men; test-retest interval: ?;<br>blinded ex-pt: no                                                                                                            | Inter -0.24kg LOA -2.46 and 1.82<br>Intra patient Men 2xSD 3.93kg (% range<br>10.5) Women 2xSD 1.19 (6.1%)<br>Intra healthy Men 2xSD 6.36kg (17%)<br>Women 2xSD 1.71kg (8.8%)<br>Inter healthy Men 2xSD 2.12 kg<br>(5.7%) Women 2xSD 2.12kg<br>(10.9%)                                                                                                                                                                                                          |
| Functional<br>lifting test | Wang'03<br>Reliability                 | 32 healthy subject<br>and 30 patients<br>with non-specific<br>neck pain | Physical therapist                                                      | Timed weighted overhead test, subject stands facing work<br>board (12 inches in height, 30 inches width), on which<br>several chains have been strung from side to side. Subjects<br>have to raise their arms overhead, pull a rope with their<br>hands with 5 pound cuff weight attached to each wrist; time<br>measured with stopwatch; test-retest interval: ?; blinded ex-<br>pt: no | ICC Intra healthy 0.78, neck pain 0.88                                                                                                                                                                                                                                                                                                                                                                                                                          |

EX = examiner, Pt = patient, Pearson r = Pearson correlation coefficient, Intra = intraobserver, Inter = interobserver, ICC = Intraclass correlation coefficient, MVC = maximum voluntary contraction, min = minute, SEM = standard error of measurement, MDC = minimal detectable change, LoA = limits of agreement, cervical PILE test = progressive iso-inertial lifting evaluation test, WAD = whiplash associated disorder
